# Supplementary material for: A new metallostar complex based on an aluminum(iii) 8-hydroxyquinoline core as a potential bimodal contrast agent
Source: Royal Society of Chemistry journal article supplement (doi:10.1039/c2dt30605k), 2012-01-01
Supplement: c2dt30605k.pdf [file c2dt30605k.pdf]

## Supporting Information

### **A new metallostear complex based on an aluminum(III) 8-hydroxyquinoline core as a potential bimodal contrast agent**

Elke Debroye,<sup>[a]</sup> Geert Dehaen,<sup>[a]</sup> Svetlana V. Eliseeva,<sup>[b]</sup> Sophie Laurent,<sup>[c]</sup> Luce Vander Elst,<sup>[c]</sup> Robert N. Muller,<sup>[c]</sup> Koen Binnemans<sup>[a]</sup> and Tatjana N. Parac-Vogt\*<sup>[a]</sup>

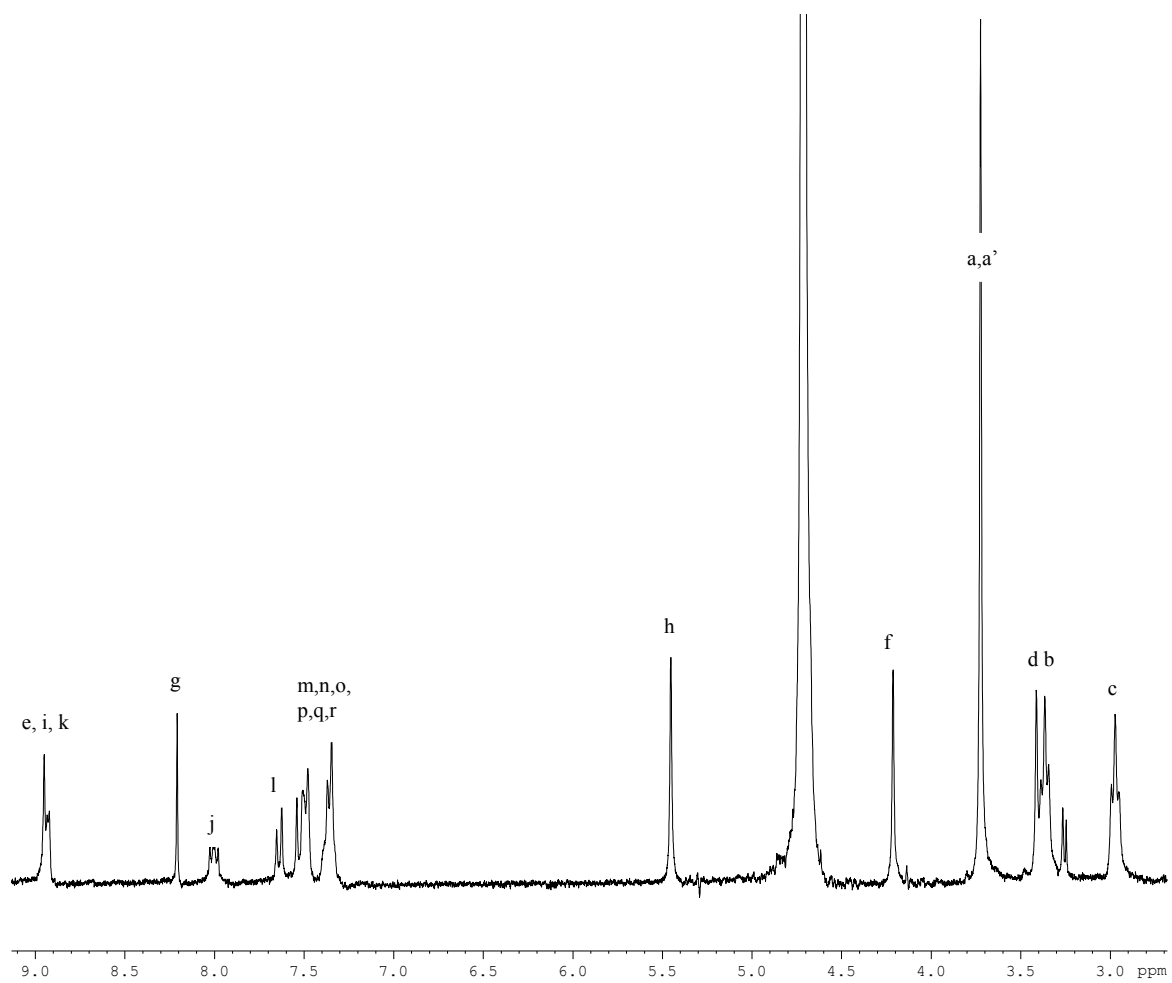

Figure S1. Proton NMR spectrum of ligand H<sub>4</sub>4 in D<sub>2</sub>O at 298 K. For the resonance assignment, see Scheme 1.

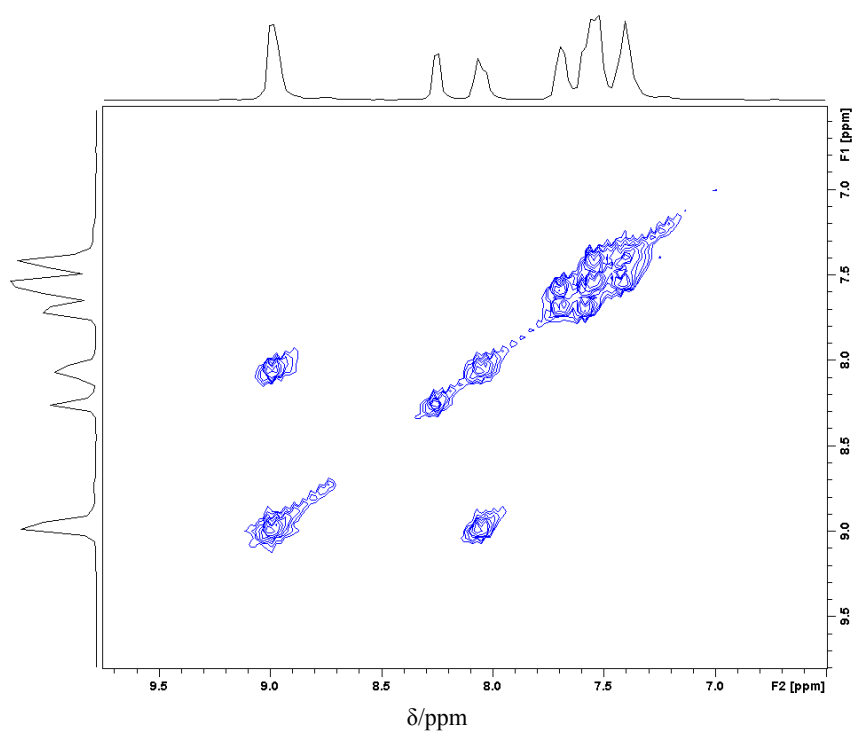

Figure S2. 2D COSY NMR spectrum of the aromatic region of ligand H<sub>4</sub> in DMSO-*d*<sub>6</sub>.

Figure S3. Positive mode ESI-MS of the final metallostar complex [(Gd<sub>5</sub>)<sub>3</sub>Al(H<sub>2</sub>O)<sub>3</sub>]<sup>3+</sup> showing a molecular peak [M+4Na+2H+2H<sub>2</sub>O]<sup>3+</sup> at *m/z* = 796.4.

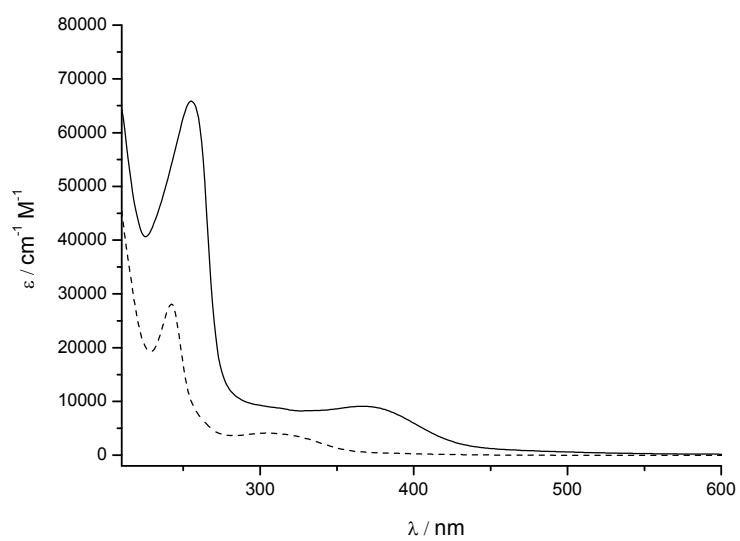

Figure S4. Absorption spectra of  $[\text{Gd}(\text{H}5)(\text{H}_2\text{O})]^-$  (dashed line), and of the metallostar complex  $[(\text{Gd}5)_3\text{Al}(\text{H}_2\text{O})_3]^{3-}$  (solid line) in  $\text{H}_2\text{O}$ .
